# Supplementary material
Source: bioRxiv or medRxiv preprint supplement (https://www.biorxiv.org/highwire/filestream/84072/field_highwire_adjunct_files/1/270934-2.pdf)

**A**

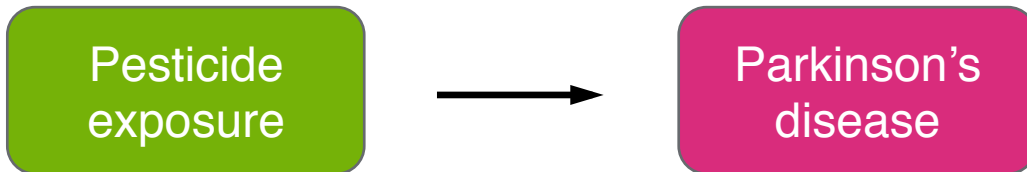

**B**

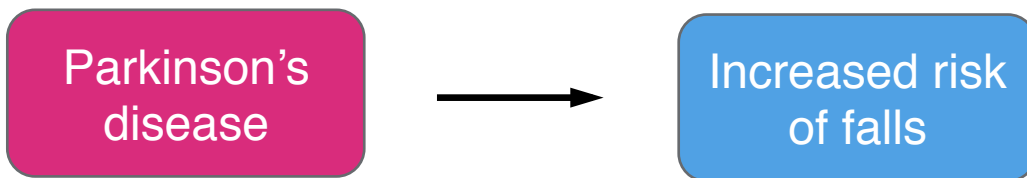

**C**

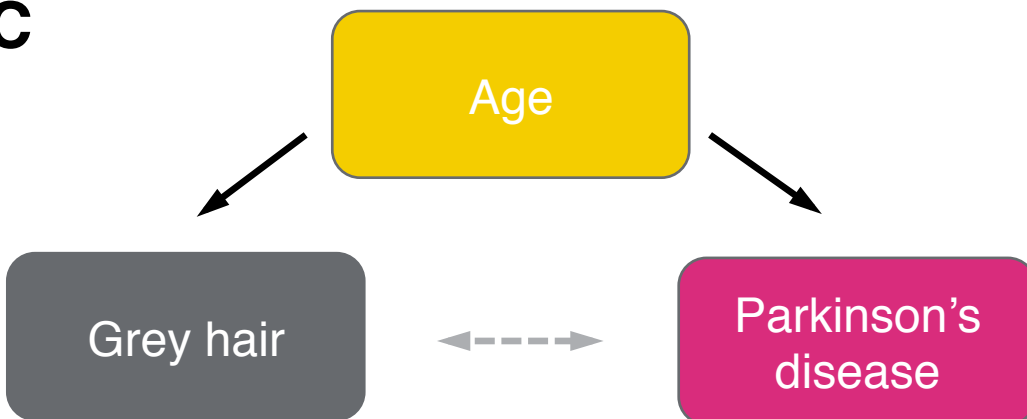

Supplement: Supplementary file [file 270934-2.pdf]
